# Supplementary material
Source: PubMed Central journal article supplement (PMC3078426)
Supplement: mmc2.pdf [file mmc2.pdf]

**Supplemental Table 1. Summary of *Ptpn6/Shp-1* mutations in mice**

| Name                                 | Life span   | Genomic                                               | cDNA                                                  | Protein           | Domain           | Detection           | Strain          | Reference  |
|--------------------------------------|-------------|-------------------------------------------------------|-------------------------------------------------------|-------------------|------------------|---------------------|-----------------|------------|
| <i>Ptpn6</i> <sup>me/me</sup>        | 3 weeks     | exon 3: 1bp deletion                                  | alternative splicing: 101bp, frame shift              | 102AA (truncated) | SH2 <sub>N</sub> | RFLP, <i>TaqI</i>   | C57BL/6J        | 2          |
| <i>Ptpn6</i> <sup>mev/mev</sup>      | 6 weeks     | intron 9: SNP (T/A)                                   | alternative splicing: 15bp (exon 9) or +69 (intron 9) | -5AA or +23AA     | PTPase           | sequencing          | C57BL/6J        | 3          |
| <i>Ptpn6</i> <sup>spin/spin</sup>    | > 12 months | exon 5: SNP (T/A)                                     | no alternative splicing, no frame shift               | Y208N             | SH2 <sub>C</sub> | RFLP, <i>HincII</i> | C57BL/6J        | 7          |
| <i>Ptpn6</i> <sup>meb2/meb2</sup>    | > 12 months | exon 6: B2 repeat insertion (247bp) +16bp duplication | alternative splicing: -39bp+24bp, in frame            | -13AA and +8AA    | none             | PCR                 | BALB/c          | This paper |
| <i>Ptpn6</i> <sup>fl</sup> ;Mx1-cre  | > 12 months | exon 1b-exon9 deletion                                | DN                                                    | DN                | all              | DN                  | C57BL6 x 129Ola | 62         |
| <i>Ptpn6</i> <sup>fl</sup> ;LysM-cre | > 12 months | exon 1b-exon9 deletion                                | incomplete deletion                                   | leaking           | all              | PCR                 | C57BL6 x 129Ola | 62         |
| <i>Ptpn6</i> <sup>fl</sup> ;CD19-cre | > 12 months | exon 1b-exon9 deletion                                | incomplete deletion                                   | leaking           | all              | S, W, PCR           | C57BL6 x 129Ola | 62         |

DN – data not shown (not available); S: Southern blot; W: Western blot; SNP: single nucleotide polymorphism; RFLP: Restriction Fragment Length Polymorphism
